# Supplementary material
Source: MDPI journal article supplement (https://www.mdpi.com/2076-3298/8/2/8)
Supplement: s1 [file s1]

Supplementary Material

# An Investigation of the Potential Adoption of Anaerobic Digestion for Energy Production in Irish Farms

Sean O'Connor <sup>1,\*</sup>, Ehiaze Ehimen <sup>1</sup>, Suresh C. Pillai <sup>1</sup>, Niamh Power <sup>2</sup>, Gary Lyons <sup>3</sup> and John Bartlett <sup>1</sup>

<sup>1</sup> Department of Environmental Science, Institute of Technology Sligo, Sligo F91 YW50, Ireland; ehimen.ehiza@itsligo.ie (E.E.); pillai.suresh@itsligo.ie (S.C.P); bartlett.john@itsligo.ie (J.B.)

<sup>2</sup> Department of Civil, Structural and Environmental Engineering, Sustainable Infrastructure Research and Innovation Research Group, Cork Institute of Technology, Cork, Ireland; niamh.power@cit.ie

<sup>3</sup> Agri-Environment Branch, Agri-Food and Biosciences Institute, Large Park, Hillsborough BT26 6DR, UK; gary.lyons@afbini.gov.uk

\* Correspondence: sean.oconnor2@mail.itsligo.ie; Tel.: +353-(0)71-91-55222

## Appendix A

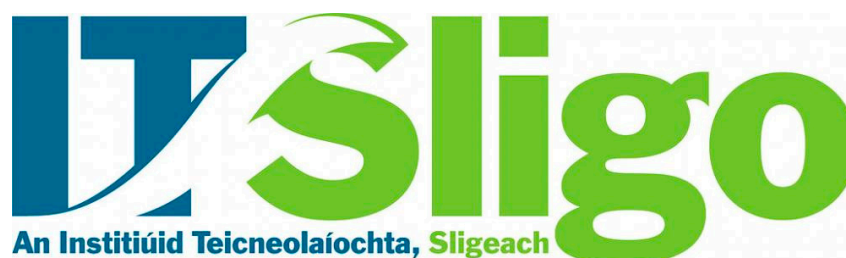

**Citation:** O'Connor, S.; Ehimen, E.; Pillai, S.C.; Power, N.; Lyons, G.; Bartlett, J. An Investigation of the Potential Adoption of Anaerobic Digestion for Energy Production in Irish Farms. *Environments* **2021**, *8*, 8. <https://doi.org/10.3390/environments8020008>

Received: 30 November 2020

Accepted: 20 January 2021

Published: 27 January 2021

**Publisher's Note:** MDPI stays neutral with regard to jurisdictional claims in published maps and institutional affiliations.

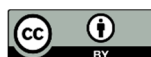

**Copyright:** © 2021 by the authors. Submitted for possible open access publication under the terms and conditions of the Creative Commons Attribution (CC BY) license (<http://creativecommons.org/licenses/by/4.0/>).

Date:

A Chara,

We are examining the potential uptake of anaerobic digestion plants on farms in Ireland. The following survey should take less than 5 minutes to complete. All answers will be treated in the strictest confidence, and no individual will be identified. If you choose to participate in this project, please answer all questions and return the completed questionnaire.

If you are not satisfied with the manner in which this study is being conducted, you may report (anonymously if you so choose) any complaints to bartlett.john@mail.itsligo.ie.

Thank you for your feedback!

Is mise le meas,

Seán O'Connor

PhD Student

sean.oconnor2@mail.itsligo.ie

1. What county is your farm located? \_\_\_\_\_

2. How many animals do you have on your farm?

|                    | Answer |
|--------------------|--------|
| Dairy cattle       |        |
| Beef cattle        |        |
| Sheep              |        |
| Pigs               |        |
| Goats              |        |
| Hens               |        |
| Other – Please say |        |

3. What area of land do you have? Answer in hectares or acres.

|                         | Hectares | Acres |
|-------------------------|----------|-------|
| Total area farmed       |          |       |
| Area owner-occupied     |          |       |
| Area rented             |          |       |
| Cereals area            |          |       |
| Other arable crops area |          |       |
| Grassland area          |          |       |
| Permanent pasture area  |          |       |
| Rough grazing area      |          |       |

4. What is your age? Please tick the appropriate box (✓).

- ☐ Less than 35 years  
☐ 35-44 years  
☐ 45-54 years  
☐ 55-64 years  
☐ 65 years and over

5. What is your educational level? Please tick the appropriate box (✓).

- ☐ Primary or below  
☐ Secondary (including Group/International/Junior Certificate)  
☐ Third Level College/Institution  
☐ Postgraduate Degree  
☐ Apprenticeships  
☐ Did not undertake formal study

6. Have you any of the following renewable technologies on your farm?

|                                       | Tick all that apply<br>(✓) | Please indicate year commis-<br>sioned |
|---------------------------------------|----------------------------|----------------------------------------|
| CHP (combined heat and power)<br>unit |                            |                                        |
| Anaerobic digestion                   |                            |                                        |
| Biomass boiler                        |                            |                                        |
| Solar panels                          |                            |                                        |
| Wind turbine                          |                            |                                        |
| Woodchip/pellet production            |                            |                                        |
| Other – Please specify                |                            |                                        |

If yes, please tick why this renewable technology was chosen?

- |                                                                 |                                                           |
|-----------------------------------------------------------------|-----------------------------------------------------------|
| <input type="checkbox"/> To exploit government grants/subsidies | <input type="checkbox"/> To add another source of revenue |
| <input type="checkbox"/> To support government targets          | <input type="checkbox"/> To reduce farm business costs    |
| <input type="checkbox"/> To reduce greenhouse gas emissions     | <input type="checkbox"/> To dispose of farm waste         |
| <input type="checkbox"/> Other motivations – Please say         |                                                           |

7. Would you consider installing an Anaerobic Digestion plant on your farm in the next five years?

- ☐ Yes  
☐ No  
☐ Maybe

#### Explanation of Anaerobic Digestion

- Anaerobic digestion is a renewable energy technology, which can be used on farms to convert manure and energy crops into biogas, which can be then used to produce electricity and heat.
- The benefits include an additional source of revenue, and lowering greenhouse gas emissions.
- An example an anaerobic digestion plant installed in Dendauw in West Flanders (Belgium) had an investment of €95,000. With subsidies the plant achieved a payback period of 7 to 10 years. This farm contained 70 productive dairy cows, 50 heifers, and roughly 100 hens.

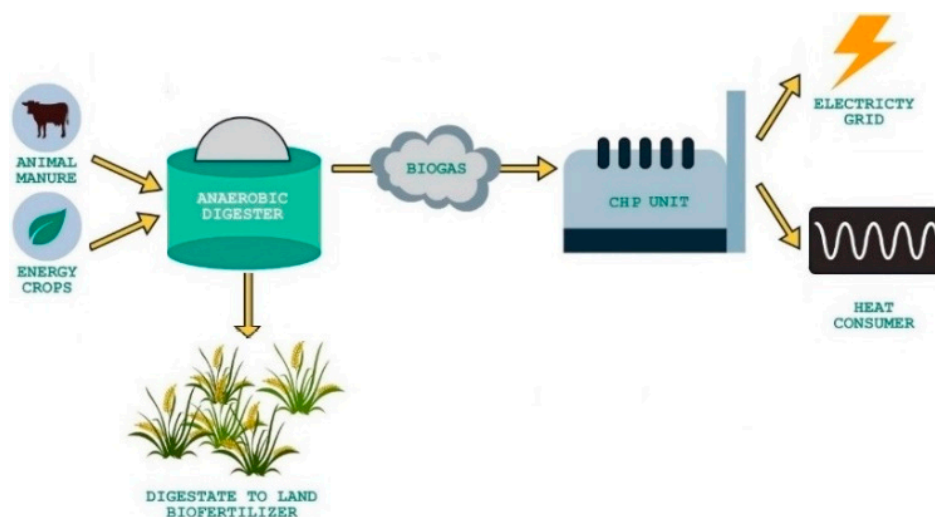

What are the main reasons for your answer?

8. Would you consider taking part in a co-operative scheme where 2 to 5 local farmers' feed slurry into an anaerobic digestion plant?

- ☐ Yes  
☐ No  
☐ Maybe

**9. Anaerobic digestion systems require some training to operate. If you were to install a plant, what operating structure do you ideally see?**

| Please tick (✓)                                                                       |
|---------------------------------------------------------------------------------------|
| Self-owned and operated                                                               |
| Self-owned and third-party operated (third party supplies expertise to operate plant) |
| Third-party owned and self-operate (you will run the system)                          |
| Third-party owned and operated (farmer supplies feedstock only)                       |

**10. Tick the possible benefits of installing an anaerobic digestion plant in terms of importance to you.**

|                                    | Very important | Important | No opinion | Unimportant |
|------------------------------------|----------------|-----------|------------|-------------|
| To improve farm profitability      |                |           |            |             |
| To reduce greenhouse gas emissions |                |           |            |             |
| To add another revenue stream      |                |           |            |             |
| To reduce farm pollution           |                |           |            |             |
| To reduce farm business costs      |                |           |            |             |
| Other reasons – Please specify     |                |           |            |             |

**11. Tick the possible obstacles to installing an anaerobic digestion plant in terms of importance.**

|                                                   | Strongly agree | Agree | No Opinion | Disagree | Strongly Disagree |
|---------------------------------------------------|----------------|-------|------------|----------|-------------------|
| I do not have enough information                  |                |       |            |          |                   |
| Investment costs are too high                     |                |       |            |          |                   |
| It would be too difficult to operate              |                |       |            |          |                   |
| The financial return seem uncertain               |                |       |            |          |                   |
| I do not believe the technology has been proven   |                |       |            |          |                   |
| My rental agreement would not allow it            |                |       |            |          |                   |
| It would be difficult to gain planning permission |                |       |            |          |                   |
| Other                                             |                |       |            |          |                   |

**Any other comments?**

**Thank you for your participation!**
